# Supplementary material for: Suicide and Changes in Expression of Neuronal miRNA Predicted by an Algorithm Search through miRNA Databases
Source: MDPI journal article supplement (doi:10.3390/genes13040562), 2022-03-23
Supplement: s1 [file s1]

Supplementary

# Suicide and changes in expression of neuronal miRNA predicted by an algorithm search through miRNA databases

Alja Videtič Paska <sup>1</sup>, Urban Alič <sup>2</sup>, Tomaž Zupanc <sup>3</sup> and Katarina Kouter <sup>1,\*</sup>

<sup>1</sup> Institute of Biochemistry and Molecular Genetics, Faculty of Medicine, University of Ljubljana, 1000 Ljubljana Slovenia; alja.videtic@mf.uni-lj.si, katarina.kouter@mf.uni-lj.si

<sup>2</sup> Faculty of Medicine, University of Ljubljana, 1000 Ljubljana, Slovenia; urbanalich@gmail.com

<sup>3</sup> Institute of Forensic Medicine, Faculty of Medicine, University of Ljubljana, 1000 Ljubljana, Slovenia; tomaz.zupanc@mf.uni-lj.si

\* Correspondence: katarina.kouter@mf.uni-lj.si

**Table S1.** Study subject information Toxicology screen was performed on blood and urine.

| Subjects | Cause of death        | Age (years) | PMI (hours) | Toxicology screen                     |
|----------|-----------------------|-------------|-------------|---------------------------------------|
| S1       | hanging               | 38          | 12          | none detected                         |
| S2       | hanging               | 60          | 22.5        | none detected                         |
| S3       | hanging               | 39          | 28          | none detected                         |
| S4       | hanging               | 46          | 9,5         | antidepressants, antipsychotics       |
| S5       | hanging               | 54          | 36.5        | ethanol                               |
| S6       | hanging               | 51          | 15          | ethanol, antidepressants, anxiolytics |
| S7       | hanging               | 59          | 15          | antidepressants                       |
| S8       | hanging               | 58          | 41,5        | ethanol                               |
| S9       | hanging               | 50          | 12          | ethanol                               |
| S10      | hanging               | 35          | 51.5        | ethanol                               |
| S11      | hanging               | 32          | 61          | ethanol                               |
| S12      | hanging               | 48          | 40          | antidepressants                       |
| S13      | hanging               | 54          | 23          | none detected                         |
| S14      | hanging               | 39          | 33          | ethanol                               |
| S15      | hanging               | 32          | 32.5        | ethanol                               |
| S16      | hanging               | 46          | 36          | ethanol                               |
| S17      | hanging               | 58          | 17          | ethanol                               |
| S18      | hanging               | 30          | 13          | ethanol                               |
| S19      | hanging               | 29          | 34.5        | ethanol, antipsychotics               |
| S20      | hanging               | 33          | 16.5        | none detected                         |
| C1       | sudden cardiac arrest | 51          | 15          | none detected                         |
| C2       | sudden cardiac arrest | 54          | 19          | none detected                         |
| C3       | sudden cardiac arrest | 47          | 12          | none detected                         |
| C4       | sudden cardiac arrest | 55          | 17          | none detected                         |
| C5       | sudden cardiac arrest | 60          | 48          | none detected                         |
| C6       | sudden cardiac arrest | 50          | 20          | ethanol                               |
| C7       | sudden cardiac arrest | 45          | 37          | none detected                         |
| C8       | sudden cardiac arrest | 59          | 22          | none detected                         |
| C9       | sudden cardiac arrest | 57          | 28          | none detected                         |

---

|     |                       |    |       |                                |
|-----|-----------------------|----|-------|--------------------------------|
| C10 | sudden cardiac arrest | 52 | 17    | none detected                  |
| C11 | sudden cardiac arrest | 61 | 18    | none detected                  |
| C12 | sudden cardiac arrest | 50 | 15    | none detected                  |
| C13 | sudden cardiac arrest | 33 | 16    | none detected                  |
| C14 | sudden cardiac arrest | 60 | 13    | ethanol                        |
| C15 | sudden cardiac arrest | 49 | 59    | antiepileptics, antipsychotics |
| C16 | sudden cardiac arrest | 60 | 106.5 | ethanol                        |
| C17 | sudden cardiac arrest | 64 | 17    | none detected                  |
| C18 | sudden cardiac arrest | 63 | 23    | ethanol                        |
| C19 | sudden cardiac arrest | 57 | 19    | none detected                  |
| C20 | sudden cardiac arrest | 63 | 20    | ethanol                        |

---

S – suicide victim, C- control group subject, PMI- postmortem interval
